# Supplementary material for: Evaluation of Unity 1.5 T MR‐linac plan quality in patients with prostate cancer
Source: PubMed Central journal article supplement (PMC10691646; doi:10.1002/acm2.14122), 2023-08-10
Supplement: ACM2-24-e14122-s001.pdf [file ACM2-24-e14122-s001.pdf]

## **SUPPLEMENTARY INFORMATION**

### **Evaluation of Unity 1.5 T MR-Linac plan quality in patients with prostate cancer**

Shohei Tanaka<sup>1</sup>, Noriyuki Kadoya<sup>1</sup>, Miyu Ishizawa<sup>2</sup>, Yoshiyuki Katsuta<sup>1</sup>, Kazuhiro Arai<sup>1</sup>, Haruna Takahashi<sup>1</sup>, Yushan Xiao<sup>1</sup>,  
Noriyoshi Takahashi<sup>1</sup>, Kiyokazu Sato<sup>3</sup>, Ken Takeda<sup>2</sup>, Keiichi Jingu<sup>1</sup>

<sup>1</sup>Department of Radiation Oncology, Tohoku University Graduate School of Medicine, Sendai, Japan

<sup>2</sup>Department of Radiological Technology, School of Health Sciences, Faculty of Medicine, Tohoku University, Sendai, Japan

<sup>3</sup>Radiation Technology, Tohoku University Hospital, Sendai, Japan

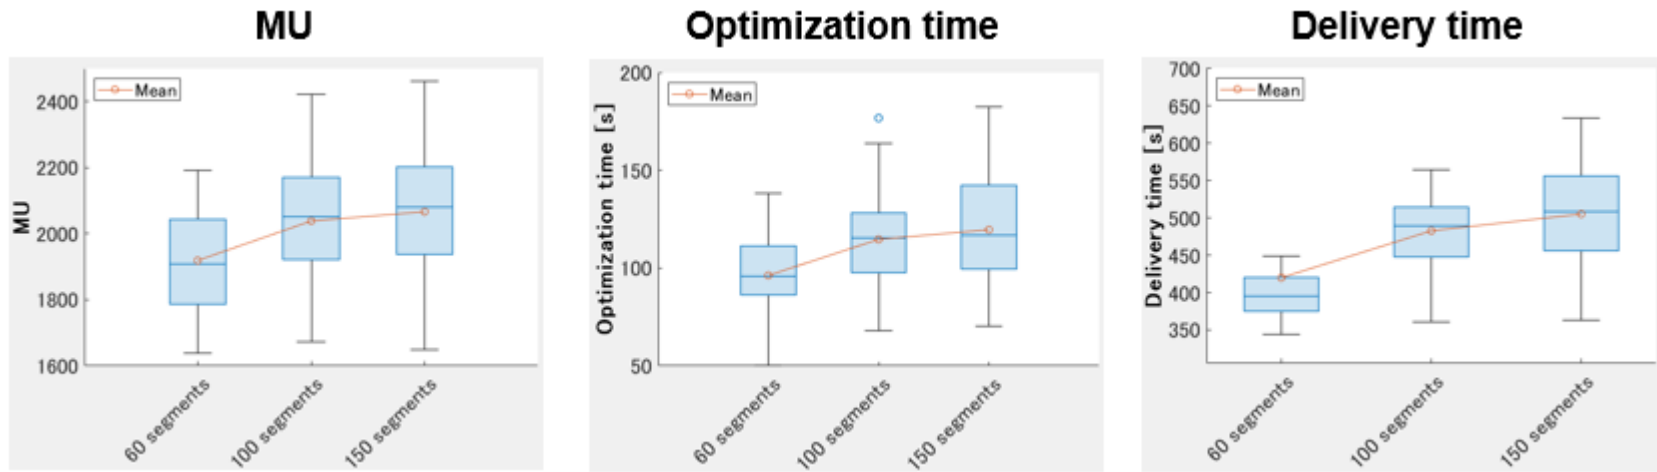

**FIGURE S1** Box plots for monitor units (MU), optimization time, and delivery time achieved using various segment numbers with 7 beams.

**TABLE S1** Gantry angle settings for each number of beams

---

---

| Number of beams | Gantry angle (°)                                                                            |
|-----------------|---------------------------------------------------------------------------------------------|
| 5               | 0, 72, 144, 216, 288                                                                        |
| 7               | 0, 51, 102, 153, 204, 255, 306                                                              |
| 9               | 0, 50, 75, 100, 150, 210, 260, 285, 310                                                     |
| 16              | 5, 25, 45, 65, 85, 105, 136, 157, 203, 224, 255, 275, 295, 315, 335, 355                    |
| 20              | 6, 24, 42, 60, 78, 96, 114, 136, 153, 170, 190, 207, 224, 246, 263, 280, 297, 314, 331, 348 |

---

---

**TABLE S2** Optimization parameters for low-risk and moderate-risk patients

| Structure name | Cost function      | Manual | Weight | Minimum volume (%) | Reference dose (Gy) | Power law exponent | Shrink margin (cm) | Isoconstraint |
|----------------|--------------------|--------|--------|--------------------|---------------------|--------------------|--------------------|---------------|
| PTV–Rectum     | Target penalty     | ✓      | 3      | 99                 |                     |                    |                    | 36.5          |
|                | Quadratic overdose | ✓      | 1      |                    | 37                  |                    |                    | 1             |
|                | Quadratic overdose | ✓      | 2      |                    | 38                  |                    |                    | 0.02          |
| PTV/Rectum     | Target penalty     | ✓      | 1      | 99.9               |                     |                    |                    | 34.5          |
| Rectum         | Quadratic overdose | ✓      | 0.2    |                    | 35.1                |                    | 0                  | 0.2           |
|                | Serial             | ✓      | 1      |                    |                     | 12                 | 0.3                | 24            |

|                       |                       |   |     |       |    |     |      |
|-----------------------|-----------------------|---|-----|-------|----|-----|------|
|                       | Serial                | ✓ | 5   |       | 10 | 0.6 | 14   |
|                       | Quadratic<br>overdose | ✓ | 0.5 | 36.8  |    |     | 0.04 |
| Bladder               | Quadratic<br>overdose | ✓ | 0.5 | 32.63 |    | 0   | 0.4  |
|                       | Serial                | ✓ | 2   |       | 10 | 0.6 | 17   |
| Left femoral<br>head  | Quadratic<br>overdose | ✓ | 0.3 | 14    |    | 0   | 0.1  |
| Right femoral<br>head | Quadratic<br>overdose | ✓ | 0.3 | 14    |    | 0   | 0.1  |
| Urethra PRV           | Quadratic<br>overdose | ✓ | 0.3 | 37.5  |    |     | 0.02 |

|      |                       |   |     |       |     |      |
|------|-----------------------|---|-----|-------|-----|------|
| Body | Quadratic<br>overdose | ✓ | 0.5 | 36.25 | 0.1 | 0.02 |
|      | Quadratic<br>overdose | ✓ | 0.3 | 18.17 | 1.5 | 0.5  |

---

PRV, planning organ at risk volume; PTV, planning target volume; PTV/Rectum, overlap between PTV and rectum.

**TABLE S3** Optimization parameters for high-risk patients

| Structure name             | Cost function         | Man<br>ual | Weig<br>ht | Minimum<br>volume (%) | Reference dose<br>(Gy) | Power law<br>exponent | Shrink margin<br>(cm) | Isoconstr<br>aint |
|----------------------------|-----------------------|------------|------------|-----------------------|------------------------|-----------------------|-----------------------|-------------------|
| Urethra PRV                | Quadratic<br>overdose | ✓          | 1          |                       | 39.2                   |                       |                       | 0.02              |
| CTV                        | Target penalty        | ✓          | 1.5        | 99.5                  |                        |                       |                       | 41                |
|                            | Target penalty        | ✓          | 2          | 95                    |                        |                       |                       | 36.3              |
| PTV–Rectum–Ureth<br>ra PRV | Quadratic<br>overdose | ✓          | 3          |                       | 42                     |                       |                       | 0.02              |
|                            | Target penalty        | ✓          | 1          | 99                    |                        |                       |                       | 34.4              |
| PTV/Rectum                 | Target penalty        | ✓          | 1          | 99.9                  |                        |                       |                       | 34.5              |
| Rectum                     | Quadratic             | ✓          | 0.5        |                       | 36                     |                       | 0                     | 0.1               |

|                    |                    |   |     |    |    |     |      |
|--------------------|--------------------|---|-----|----|----|-----|------|
|                    | overdose           |   |     |    |    |     |      |
|                    | Serial             | ✓ | 1   |    | 12 | 0.3 | 24   |
|                    | Serial             | ✓ | 5   |    | 10 | 0.6 | 14   |
|                    | Quadratic overdose | ✓ | 0.3 | 39 |    | 0.1 | 0.05 |
| Bladder            | Quadratic overdose | ✓ | 0.5 | 36 |    | 0.1 | 0.1  |
|                    | Serial             | ✓ | 2   |    | 10 | 0.6 | 17   |
| Left femoral head  | Quadratic overdose | ✓ | 0.3 | 14 |    | 0   | 0.1  |
| Right femoral head | Quadratic overdose | ✓ | 0.3 | 14 |    | 0   | 0.1  |



|                   |                    |   |     |       |     |     |
|-------------------|--------------------|---|-----|-------|-----|-----|
| Prostate + 1.5 cm | Quadratic overdose | ✓ | 0.5 | 36.25 | 0.1 | 0.1 |
| Body              | Quadratic overdose | ✓ | 0.3 | 18.75 | 1.5 | 0.3 |

CTV, clinical target volume; PRV, planning organ at risk volume; PTV, planning target volume; PTV/Rectum, overlap between PTV and rectum.

**TABLE S4** Average dose parameters for the target and organ at risk (OAR) using various segment numbers with 7 beams for low- and high-risk patients

| The average dose parameters for target and OAR |              |              |                              |                               |             |                        |              |              |                              |                               |      |
|------------------------------------------------|--------------|--------------|------------------------------|-------------------------------|-------------|------------------------|--------------|--------------|------------------------------|-------------------------------|------|
| Low-risk patients                              |              |              |                              |                               |             | High-risk patients     |              |              |                              |                               |      |
| Dosimetric parameters                          |              |              | p value                      |                               |             | Dosimetric parameters  |              |              | p value                      |                               |      |
| 60 segments                                    | 100 segments | 150 segments | 60 segments vs. 100 segments | 100 segments vs. 150 segments |             | 60 segments            | 100 segments | 150 segments | 60 segments vs. 100 segments | 100 segments vs. 150 segments |      |
| PTV-Rectum                                     |              |              |                              |                               |             | PTV-Rectum-Urethr<br>a |              |              |                              |                               |      |
| D98% (Gy)                                      | 35.87        | 35.88        | 35.90                        | 0.26                          | <b>0.01</b> | D98% (Gy)              | 35.33        | 35.39        | 35.37                        | < <b>0.01</b>                 | 0.99 |
| Dmax (Gy)                                      | 38.60        | 38.35        | 38.32                        | < <b>0.01</b>                 | 0.14        | Dmax (Gy)              | 42.77        | 42.52        | 42.54                        | < <b>0.01</b>                 | 0.67 |
| PTV/Rectum                                     |              |              |                              |                               |             | PTV/Rectum             |              |              |                              |                               |      |
| D98% (Gy)                                      | 34.82        | 34.44        | 34.63                        | 0.99                          | 0.18        | D98% (Gy)              | 34.83        | 34.67        | 34.54                        | 0.72                          | 0.35 |
| Rectum                                         |              |              |                              |                               |             | Rectum                 |              |              |                              |                               |      |
| V36Gy (cc)                                     | 0.04         | 0.03         | 0.02                         | <b>0.02</b>                   | 0.32        | V36Gy (%)              | 0.06         | 0.05         | 0.05                         | <b>0.01</b>                   | 0.96 |
| V32.6Gy (%)                                    | 1.25         | 1.15         | 1.11                         | < <b>0.01</b>                 | 0.06        | V32.6Gy (%)            | 0.60         | 0.54         | 0.53                         | <b>0.01</b>                   | 0.45 |
| V29Gy (%)                                      | 2.93         | 2.84         | 2.78                         | 0.15                          | 0.14        | V29Gy (%)              | 1.85         | 1.77         | 1.74                         | 0.12                          | 0.19 |
| V25.3Gy (%)                                    | 4.97         | 4.93         | 4.85                         | 0.21                          | 0.48        | V25.3Gy (%)            | 4.58         | 4.48         | 4.47                         | 0.16                          | 0.24 |
| V21.7Gy (%)                                    | 7.65         | 7.69         | 7.55                         | 0.37                          | 0.12        | V21.7Gy (%)            | 10.48        | 10.41        | 10.46                        | 0.40                          | 0.36 |
| V18.1Gy (%)                                    | 12.18        | 12.37        | 12.20                        | 0.79                          | 0.19        | V18.1Gy (%)            | 24.40        | 24.59        | 24.80                        | 0.78                          | 0.79 |
| Bladder                                        |              |              |                              |                               |             | Bladder                |              |              |                              |                               |      |
| V37Gy (cc)                                     | 1.80         | 1.21         | 1.22                         | < <b>0.01</b>                 | 0.52        | V37Gy (%)              | 5.17         | 4.97         | 5.01                         | <b>0.03</b>                   | 0.79 |
| V18.1Gy (%)                                    | 37.40        | 36.86        | 36.72                        | <b>0.01</b>                   | 0.13        | V18.1Gy (%)            | 36.82        | 36.73        | 36.80                        | 0.26                          | 0.74 |
| Urethra PRV                                    |              |              |                              |                               |             | Urethra PRV            |              |              |                              |                               |      |
| V38Gy (cc)                                     | 0.00         | 0.00         | 0.00                         | 0.25                          | 0.50        | Dmax (Gy)              | 39.79        | 39.58        | 39.63                        | < <b>0.01</b>                 | 0.88 |
| Left Femoral Head                              |              |              |                              |                               |             |                        |              |              |                              |                               |      |
| Dmax (Gy)                                      | 17.87        | 17.44        | 17.41                        | <b>0.03</b>                   | 0.48        | Dmax (Gy)              | 15.41        | 15.27        | 15.51                        | 0.31                          | 0.85 |
| V14.5Gy (%)                                    | 3.61         | 2.66         | 2.43                         | <b>0.02</b>                   | 0.34        | V14.5Gy (%)            | 0.64         | 0.31         | 0.33                         | 0.11                          | 0.64 |
| Right Femoral Head                             |              |              |                              |                               |             |                        |              |              |                              |                               |      |
| Dmax (Gy)                                      | 16.97        | 16.70        | 16.74                        | <b>0.04</b>                   | 0.64        | Dmax (Gy)              | 15.76        | 15.61        | 15.61                        | 0.07                          | 0.54 |
| V14.5Gy (%)                                    | 1.98         | 1.66         | 1.63                         | 0.11                          | 0.39        | V14.5Gy (%)            | 0.77         | 0.56         | 0.53                         | 0.17                          | 0.17 |
|                                                |              |              |                              |                               |             | CTV-Urethra PRV        |              |              |                              |                               |      |
|                                                |              |              |                              |                               |             | D95%                   | 39.39        | 39.30        | 39.35                        | 0.99                          | 0.06 |

CTV, clinical target volume; Dmax, maximal dose; D95%, dose administered to 95% of volume; D98%, dose administered to 98% of volume; OAR, organ at risk; PRV, planning organ at risk volume; PTV, planning target volume; PTV–Rectum–Urethra, PTV minus rectum and urethra structure; PTV/Rectum, common areas of PTV and rectum.
